# Supplementary material for: Aerosolized Intratracheal Inoculation of Recombinant Protective Antigen (rPA) Vaccine Provides Protection Against Inhalational Anthrax in B10.D2-Hc0 Mice
Source: PubMed Central journal article supplement (PMC8826967; doi:10.3389/fimmu.2022.819089), 2022-01-26
Supplement: DataSheet_1.pdf [file DataSheet_1.pdf]

## *Supplementary Material*

### **1 Supplementary Figures and Tables**

#### **1.1 Supplementary Tables**

**SUPPLEMENTARY TABLE 1** Composition and proportion of rPA spray-drying solution

| Composition   | Proportion  | Properties                            |
|---------------|-------------|---------------------------------------|
| rPA           | 0.1% (w/v)  | Antigen                               |
| CpG           | 0.1% (w/v)  | Adjuvant                              |
| D-mannitol    | 1% (w/v)    | Increases dispersibility              |
| Myo-inositol  | 1% (w/v)    | Enhances stability                    |
| L-leucine     | 0.3% (w/v)  | Enhances dispersibility and stability |
| Poloxamer 188 | 0.05% (v/v) | Enhances stability, surfactants       |

**SUPPLEMENTARY TABLE 2** Survival rates of B10.D2-Hc<sup>0</sup> and C57BL/6J mice challenged with different doses of *B. anthracis* Pasteur II spores

| Challenge route   | B10.D2-Hc <sup>0</sup> |                              | C57BL/6J             |                              |
|-------------------|------------------------|------------------------------|----------------------|------------------------------|
|                   | Challenge dose (CFU)   | Survivors/no. challenged (%) | Challenge dose (CFU) | Survivors/no. challenged (%) |
| i.t. <sup>a</sup> | 5×10 <sup>2</sup>      | 8/10 (80)                    | 1×10 <sup>3</sup>    | 10/10 (100)                  |
|                   | 1×10 <sup>3</sup>      | 6/10 (60)                    | 1×10 <sup>4</sup>    | 9/10 (90)                    |
|                   | 2.5×10 <sup>3</sup>    | 4/10 (40)                    | 1×10 <sup>5</sup>    | 7/10 (70)                    |
|                   | 5×10 <sup>3</sup>      | 0/10 (0)                     | 1×10 <sup>6</sup>    | 2/10 (20)                    |
|                   | 1×10 <sup>4</sup>      | 0/10 (0)                     | 1×10 <sup>7</sup>    | 0/10 (0)                     |

<sup>a</sup> i.t., aerosolized intratracheal inoculation.

## 1.2 Supplementary Figures

**A**

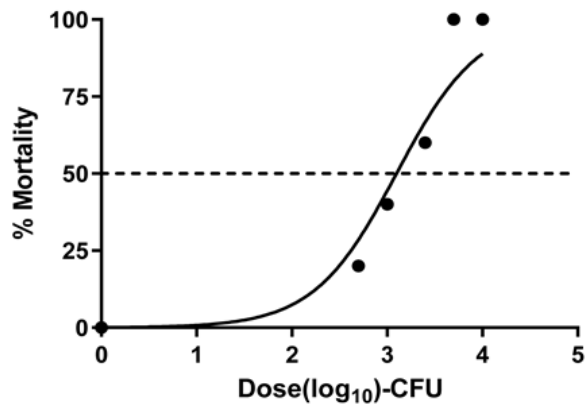

**B**

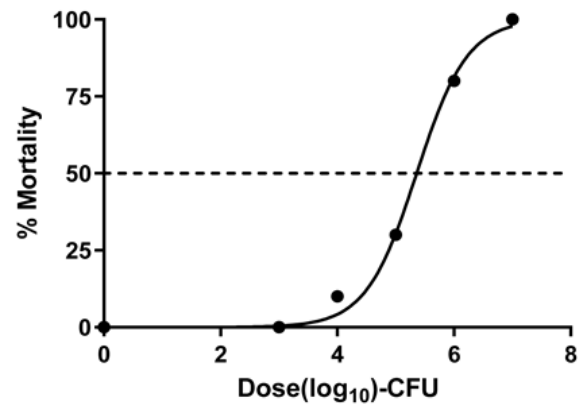

**SUPPLEMENTARY FIGURE 1.** Lethality of mice challenged with i.t. *B. anthracis* Pasteur II spores. **(A)** B10.D2-Hc<sup>0</sup> mice. **(B)** C57BL/6J mice.

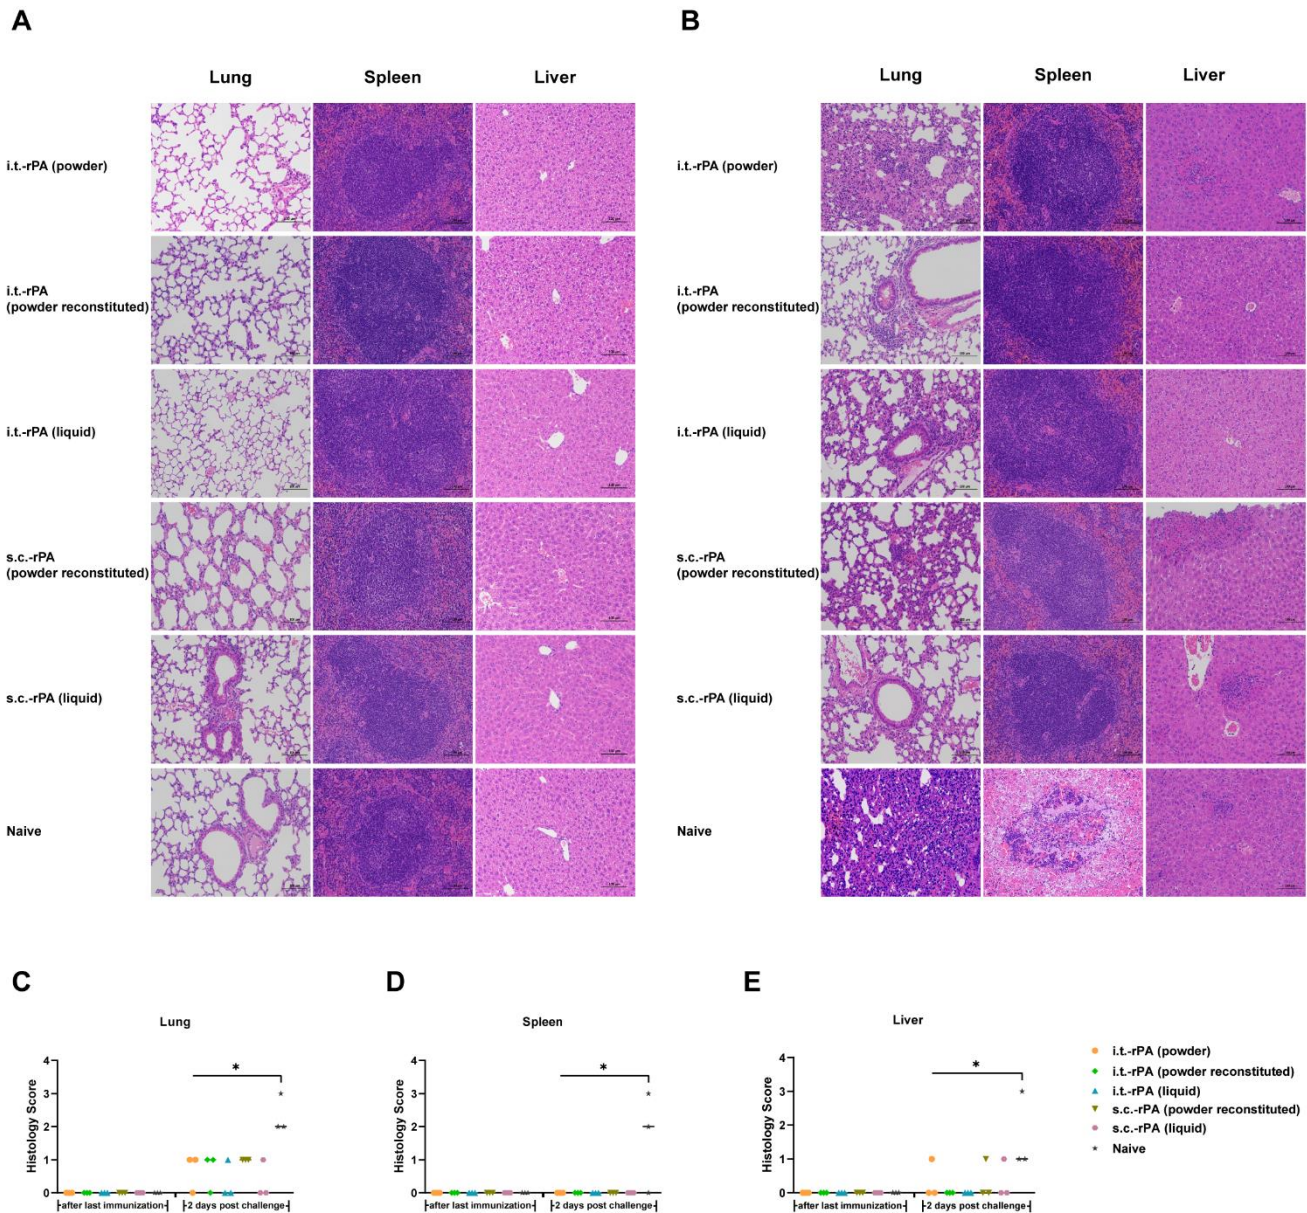

**SUPPLEMENTARY FIGURE 2.** Pathological changes in the tissues of mice after immunization and challenge. Three mice per group were euthanized 21 days after the third immunization and day 2 post  $40 \times LD_{50}$  i.t. challenge. Part of their lungs, spleen and liver were collected. The tissues collected (**A**) after the third immunization and (**B**) after i.t. challenge were tested using conventional histopathological methods and observed in HE stained sections by light microscopy. Tissue sections of (**C**) lungs, (**D**) spleens and (**E**) livers were evaluated by a trained pathologist according to the following scores: 0, no pathological lesions; 1, minimal; 2, mild; 3, moderate; 4, severe.

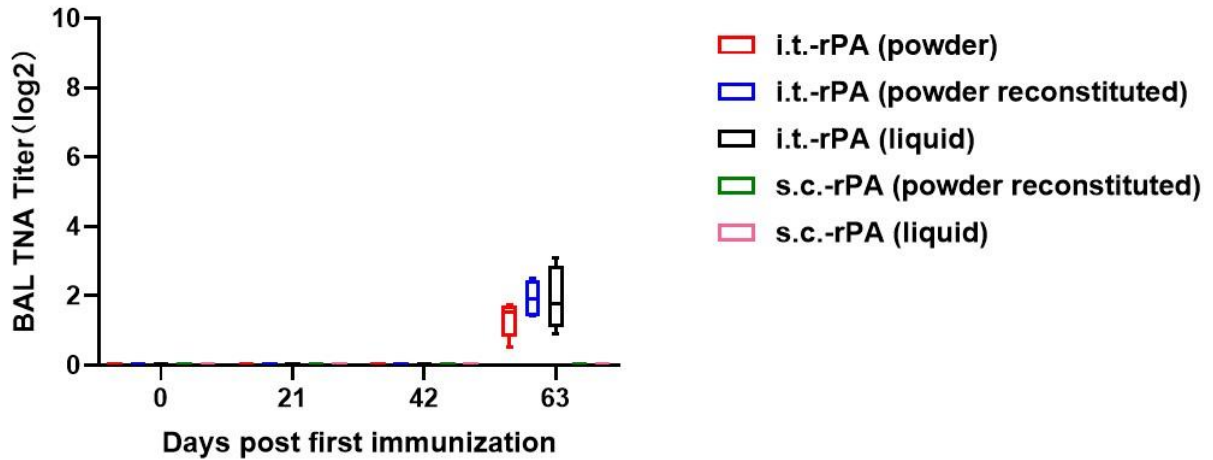

**SUPPLEMENTARY FIGURE 3.** The reciprocal titers of LeTx neutralizing antibodies to rPA in mice BAL. Titer values were determined as the inflection point of the antibody dilution curve, reported as the effective dilution at 50% inhibition ( $ED_{50}$ ) and were log<sub>2</sub> transformed. No detectable LeTx neutralizing antibody was observed in all s.c.-immunized mice BAL. Weak LeTx neutralization activities were observed in i.t.-immunized mice BAL after the third immunization.
